# Supplementary material
Source: ML conference proceedings conference paper supplement (https://openreview.net/forum?id=u1cQYxRI1H)
Supplement: supplementary_material [file attachment]

000  
001  
002  
003  
004  
005  
006  
007  
008  
009  
010  
011  
012  
013  
014  
015  
016  
017  
018  
019  
020  
021  
022  
023  
024  
025  
026  
027  
028  
029  
030  
031  
032  
033  
034  
035  
036  
037  
038  
039  
040  
041  
042  
043  
044  
045  
046  
047  
048  
049  
050  
051  
052  
053

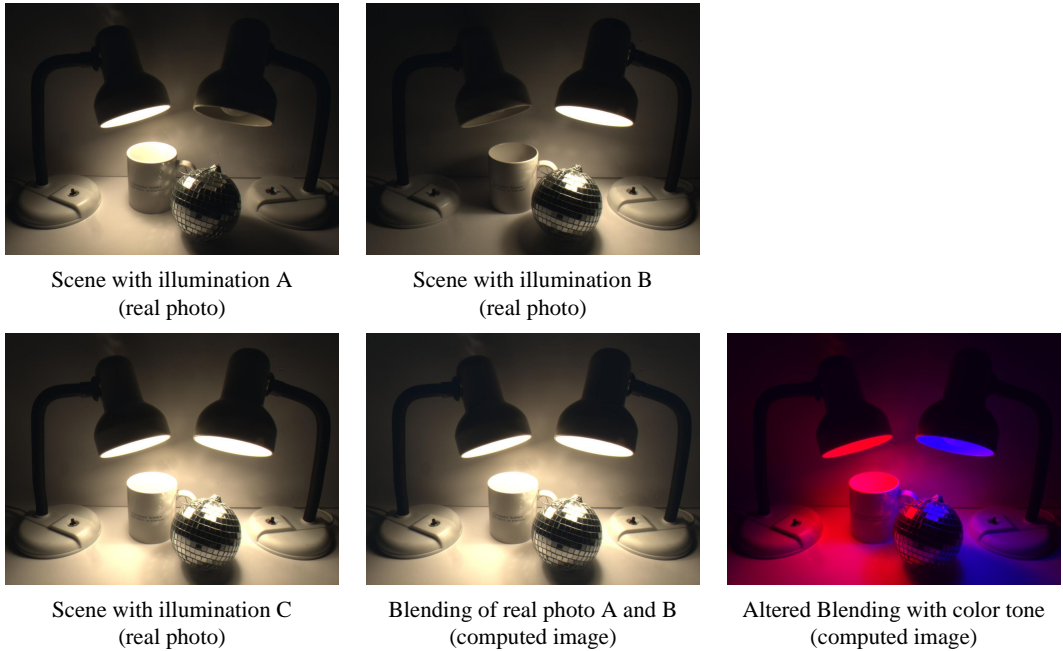

Figure 1: Examples for “the linear blending of an object’s appearances under different illumination conditions is consistent with its appearance under mixed illumination”. Images from OToole (2016).

## 1 LIGHT TRANSPORT CONSISTENCY EXAMPLE EVIDENCES

We attach additional example (OToole, 2016) as a further validation and explanation for the root of the “light transport consistency” in the main paper: the linear blending of an object’s appearances under different illumination conditions is consistent with its appearance under mixed illumination.

As shown in Fig.1, the first row presents the scene’s two appearances under two different illumination conditions (one with left light A and another with right light B). The linear blending of the two appearances yields an computed image, which is consistent with the scene’s real photo appearance if both lights are turned on. This consistency is physically precise in high-dynamic range color space. This phenomenon is equivalent to main paper’s Eq. (3).

This blending can also be used in creating extra appearances by merging with channel weights (color tones).

## 2 ADDITIONAL IMPLEMENTATION DETAILS ABOUT DATASET

**Estimation environment maps** To estimate environment maps, we randomly choose the below two methods.

- An implementation of Phongthawee et al. (2023). Probability is 30%.
- A environment-from-normal method. Probability is 70%. See the below section.

**In-the-wild image augmentation** To create a degradation image on an existing image, we first estimate albedo using a random method in the below methods:

- Directly using original image as albedo. Probability is 30%.
- An implementation of Careaga et al. (2023). Probability is 20%.
- An implementation of Xi et al. (2024). Probability is 10%.
- An implementation of Ye et al. (2024)’s delight method. Probability is 10%.

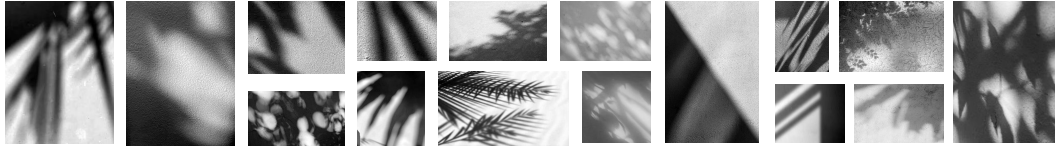

Figure 2: Examples of shadow materials. We present examples of shadow material images during training for synthesizing image degradations.

- An implementation of Bi et al. (2015). Probability is 15%.
- An implementation of Xu et al. (2011). Probability is 15%.

We then create soft shadow (with colors), we use normal maps to synthesize shadows. We use the below methods with equal probability.

- An implementation of Bae & Davison (2024).
- An implementation of Fu et al. (2024).
- An implementation of Khirodkar et al. (2024).

Those normal maps are then mapped with random environment maps (estimated in aforementioned section) to create shadow maps. Then, shadow maps are multiplied to albedos.

Note that at this step, we already have the normal map and the albedo’s reflectance. We divide the original image by the albedo to obtain the a shading map. Then, the shading map is inversely projected onto the normal sphere through pixel normal directions, while maintaining the HDR (High Dynamic Range). If a position on the normal sphere has multiple values mapped, we take the average. If there are no pixels mapped to a point on the discovery sphere, we use Poisson image inpainting Pérez et al. (2003) to fill in the blank pixels on the discovery sphere. Afterward, we map the direction and color on the discovery sphere (in HDR) to an environment map.

After that, we blend hard shadows. The shadow images are 20k high-quality shadow materials purchased from several online image stocks, and 500k generated materials using a Flux LoRA trained on those 20k purchased samples. We use two random environment maps to render a same normal map to get two shading colors, then we mask the two shading maps with the shadow mask to get hard shadow.

Finally, we add random some specular reflections to random areas. We use the normal map and random environment maps to get random specular reflections. After that, we randomly sample another hard shadow image to mask some random areas. We only add specular reflections to masked areas. To avoid adding too many specular reflections, we view each specular reflection as a connected region, and randomly drop 70% such connected regions.

### 3 ADDITIONAL IMPLEMENTATION DETAILS ABOUT FLUX TRAINING SCHEDULING

Flux.1-dev has two parts: double-stream blocks, and single-stream blocks. All blocks contributes to 12 billion parameters, which is very large and difficult to train.

We view it as 3 connected parts: (1) all double-stream blocks, (2) first 50% single-stream blocks, and (3) last 50% single-stream blocks. We first train those blocks individually with a relatively large batch size, then train multiple blocks jointly with lower batch size.

Taking PyTorch as an example, if a parts is a beginning part, to turn off the gradient computation, we only need `f(x)=torch.Tensor.detach(x)` inside `torch.no_grad` to completely avoid optimization.

If a parts is an ending part, we use `y=x + torch.Tensor.detach(f(x) - x)` together with `f(x)` inside `torch.no_grad` to avoid gradient computation.

We first train at resolution 512 to “warm-up” the training (until seeing correlation between condition images and results) and then finetune at native resolution 1024.

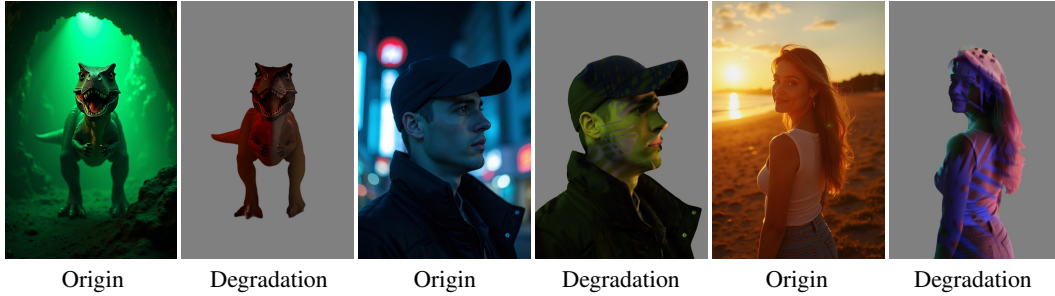

Figure 3: Examples of illumination degradations. We present examples of synthesized data with illumination degradations.

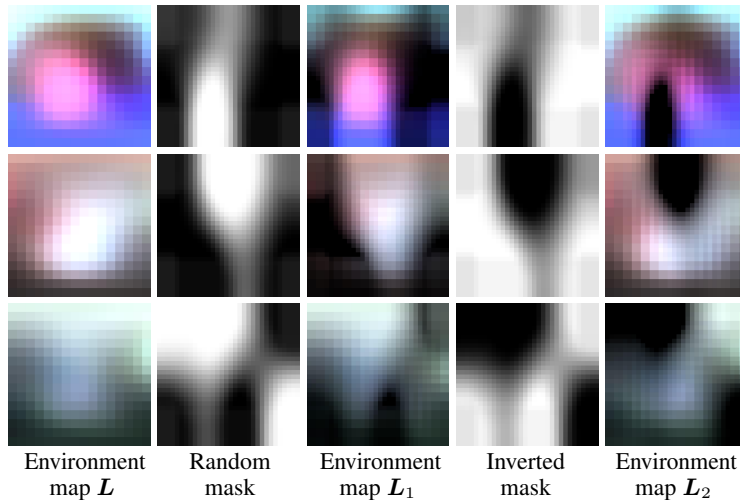

Figure 4: Examples of decomposed environment maps. We present examples to use random masks to decompose environment map  $L$  into  $L_1$  and  $L_2$ . Note that  $L = L_1 + L_2$ . A typical full environment map is usually of ratio 2:1, with size  $64 \times 32$  when convoluted. We use the front half (facing the image) of the convoluted environment map, which is  $32 \times 32$ . Using the front half makes normal-based environment extraction easier (since the image-space normals often do not have any pixels facing to the back half). Besides, the back halves of environment maps from DiffusionLight Phongthawee et al. (2023) are usually not strictly correlated to image contents and can be excluded.

#### 4 ADDITIONAL DATA VISUALIZATION

We present additional examples for shadow materials in Fig. 2.

We present additional illumination degradation examples in Fig. 3.

We present additional examples for decomposing environment maps in Fig. 4.

#### 5 ADDITIONAL RESULTS AND ABLATIVE STUDY

We present additional results and ablative study in Fig. 5-9.

We present additional background-conditioned results in Fig. 10-11.

We present additional examples of normal map blending in Fig. 12.

162  
163  
164  
165  
166  
167  
168  
169  
170  
171  
172  
173  
174  
175  
176  
177  
178  
179  
180  
181  
182  
183  
184  
185  
186  
187  
188  
189  
190  
191  
192  
193  
194  
195  
196  
197  
198  
199  
200  
201  
202  
203  
204  
205  
206  
207  
208  
209  
210  
211  
212  
213  
214  
215

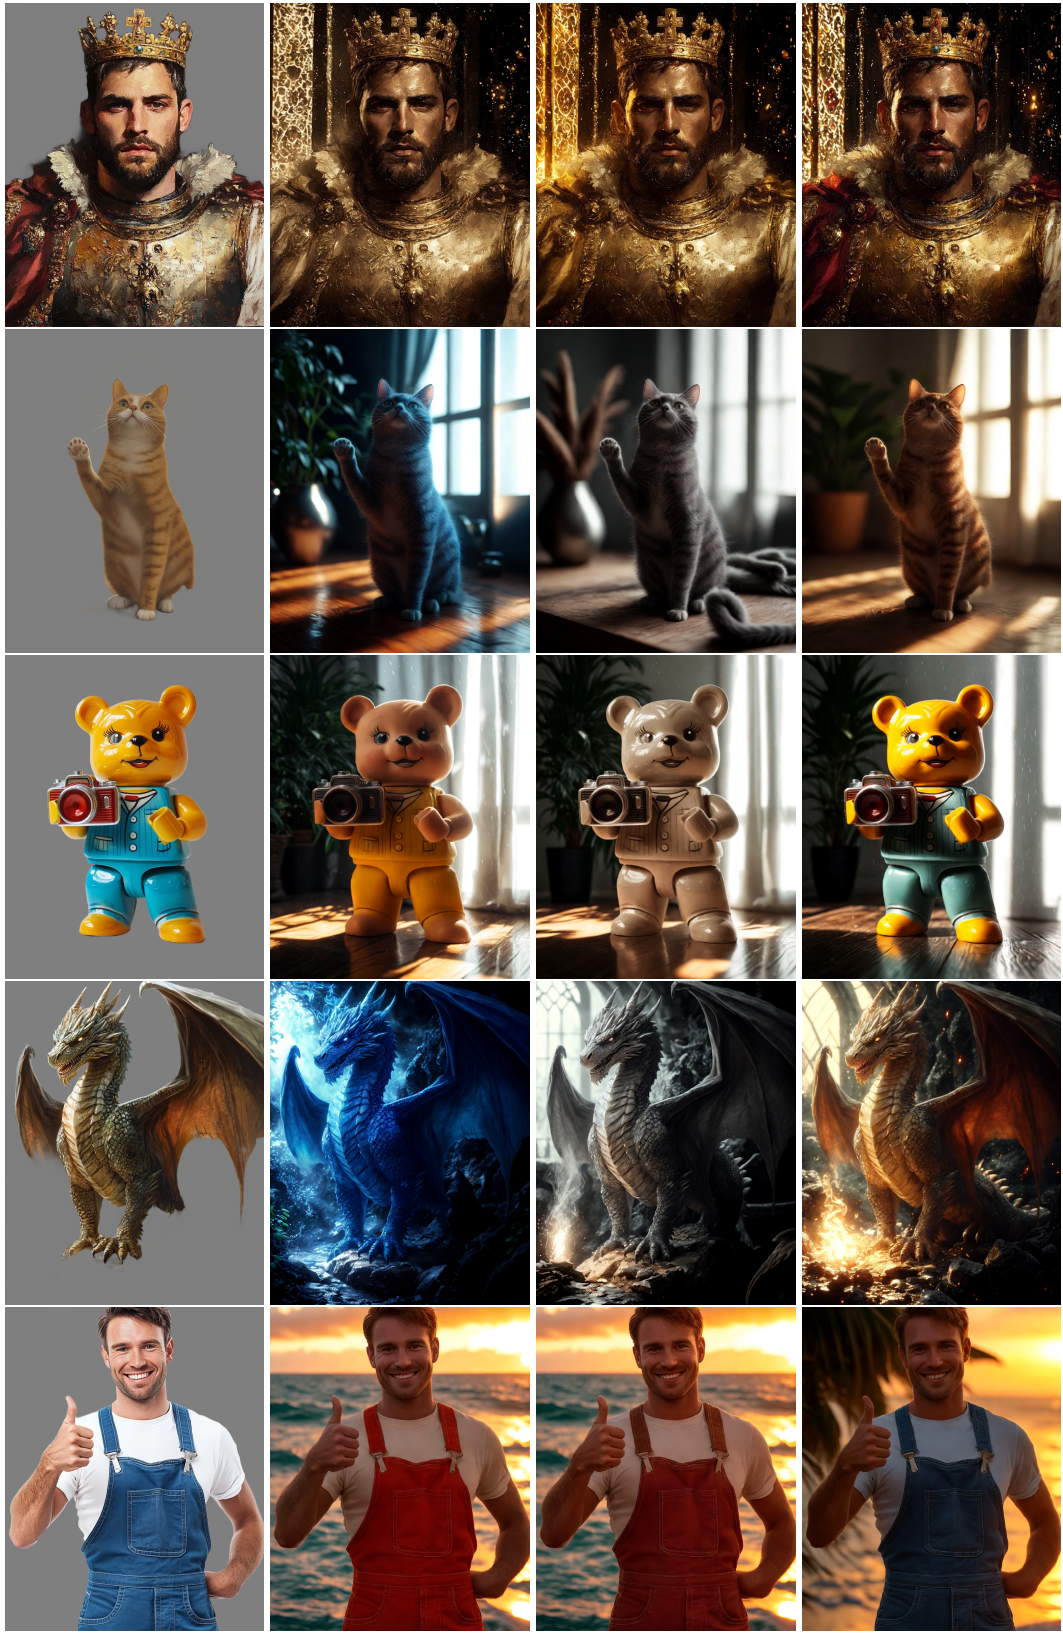

Input

removing in-the-wild  
data

removing light transport  
consistency

Ours

Figure 5: Additional Results and Ablative Study. Seed is always 12345. The prompts are “king, magic lit”, “cat, soft studio lighting”, “toy, natural lighting”, “dragon, magic lit”, “handsome man, detailed face, sunset over sea”.

216  
217  
218  
219  
220  
221  
222  
223  
224  
225  
226  
227  
228  
229  
230  
231  
232  
233  
234  
235  
236  
237  
238  
239  
240  
241  
242  
243  
244  
245  
246  
247  
248  
249  
250  
251  
252  
253  
254  
255  
256  
257  
258  
259  
260  
261  
262  
263  
264  
265  
266  
267  
268  
269

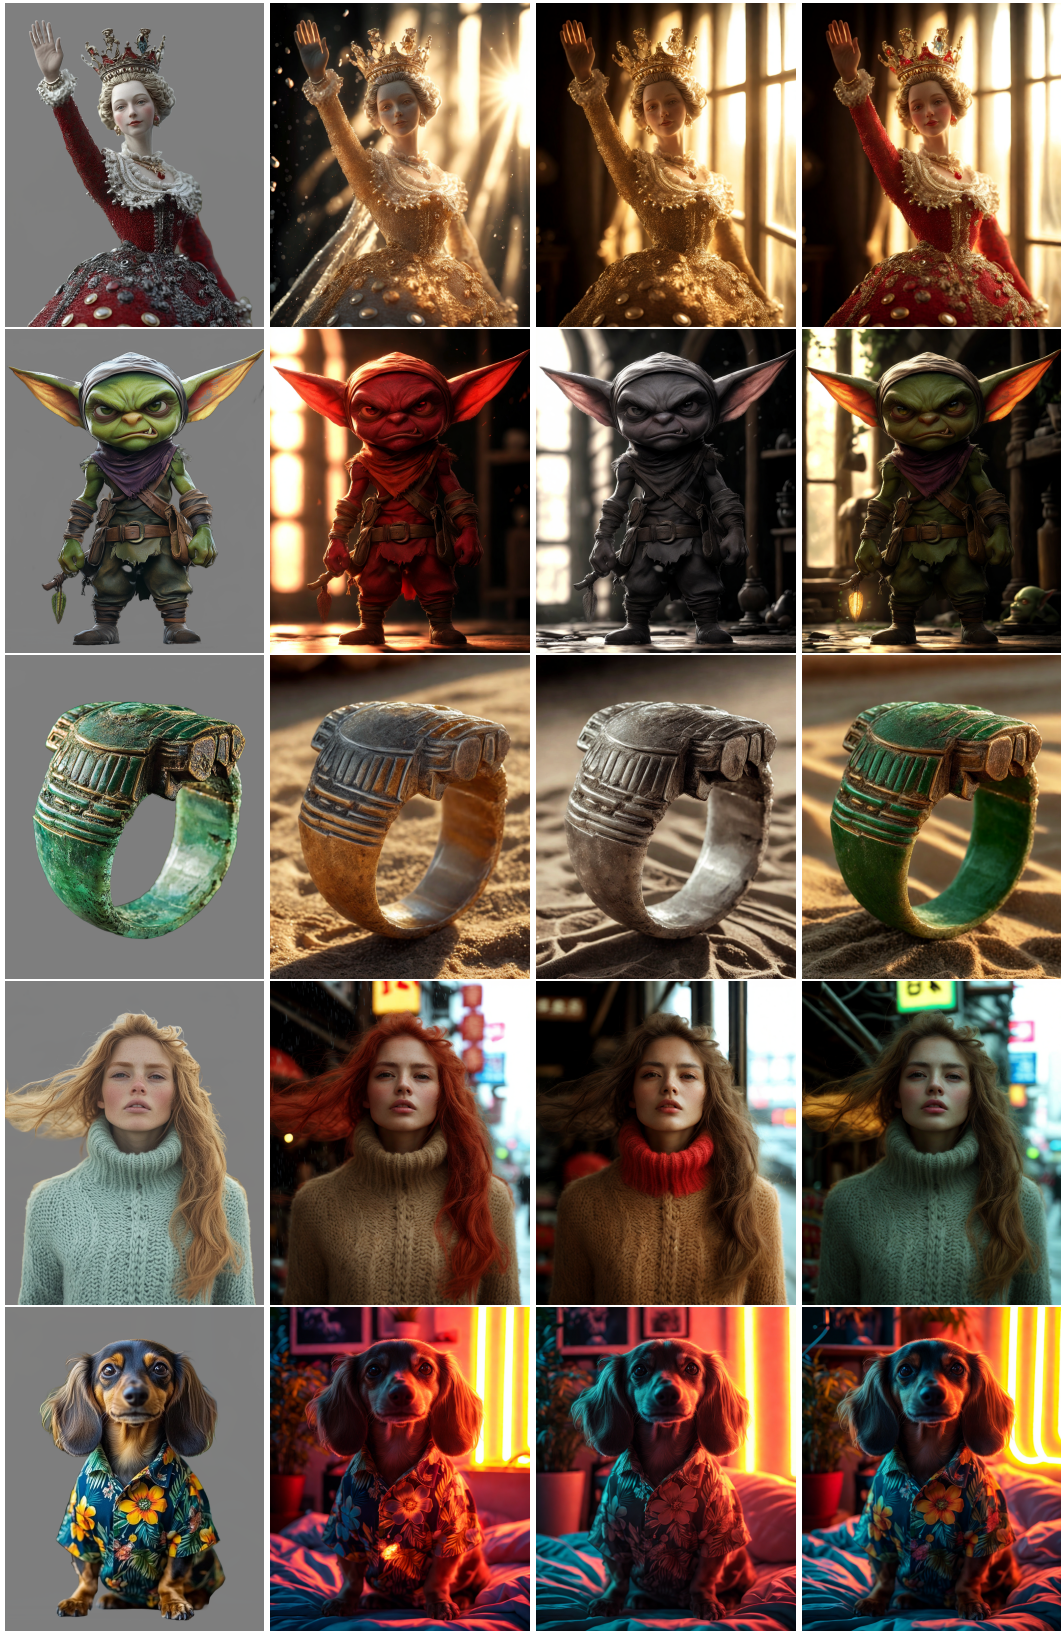

Input

removing in-the-wild  
data

removing light transport  
consistency

Ours

Figure 6: Additional Results and Ablative Study. Seed is always 12345. The prompts are “toy queen, natural lighting”, “goblin, magic lit”, “ring, on sands”, “beautiful woman, detailed face, neon, Wong Kar-wai, warm”, “dog, neon light, warm atmosphere, at home, bedroom”.

270  
271  
272  
273  
274  
275  
276  
277  
278  
279  
280  
281  
282  
283  
284  
285  
286  
287  
288  
289  
290  
291  
292  
293  
294  
295  
296  
297  
298  
299  
300  
301  
302  
303  
304  
305  
306  
307  
308  
309  
310  
311  
312  
313  
314  
315  
316  
317  
318  
319  
320  
321  
322  
323

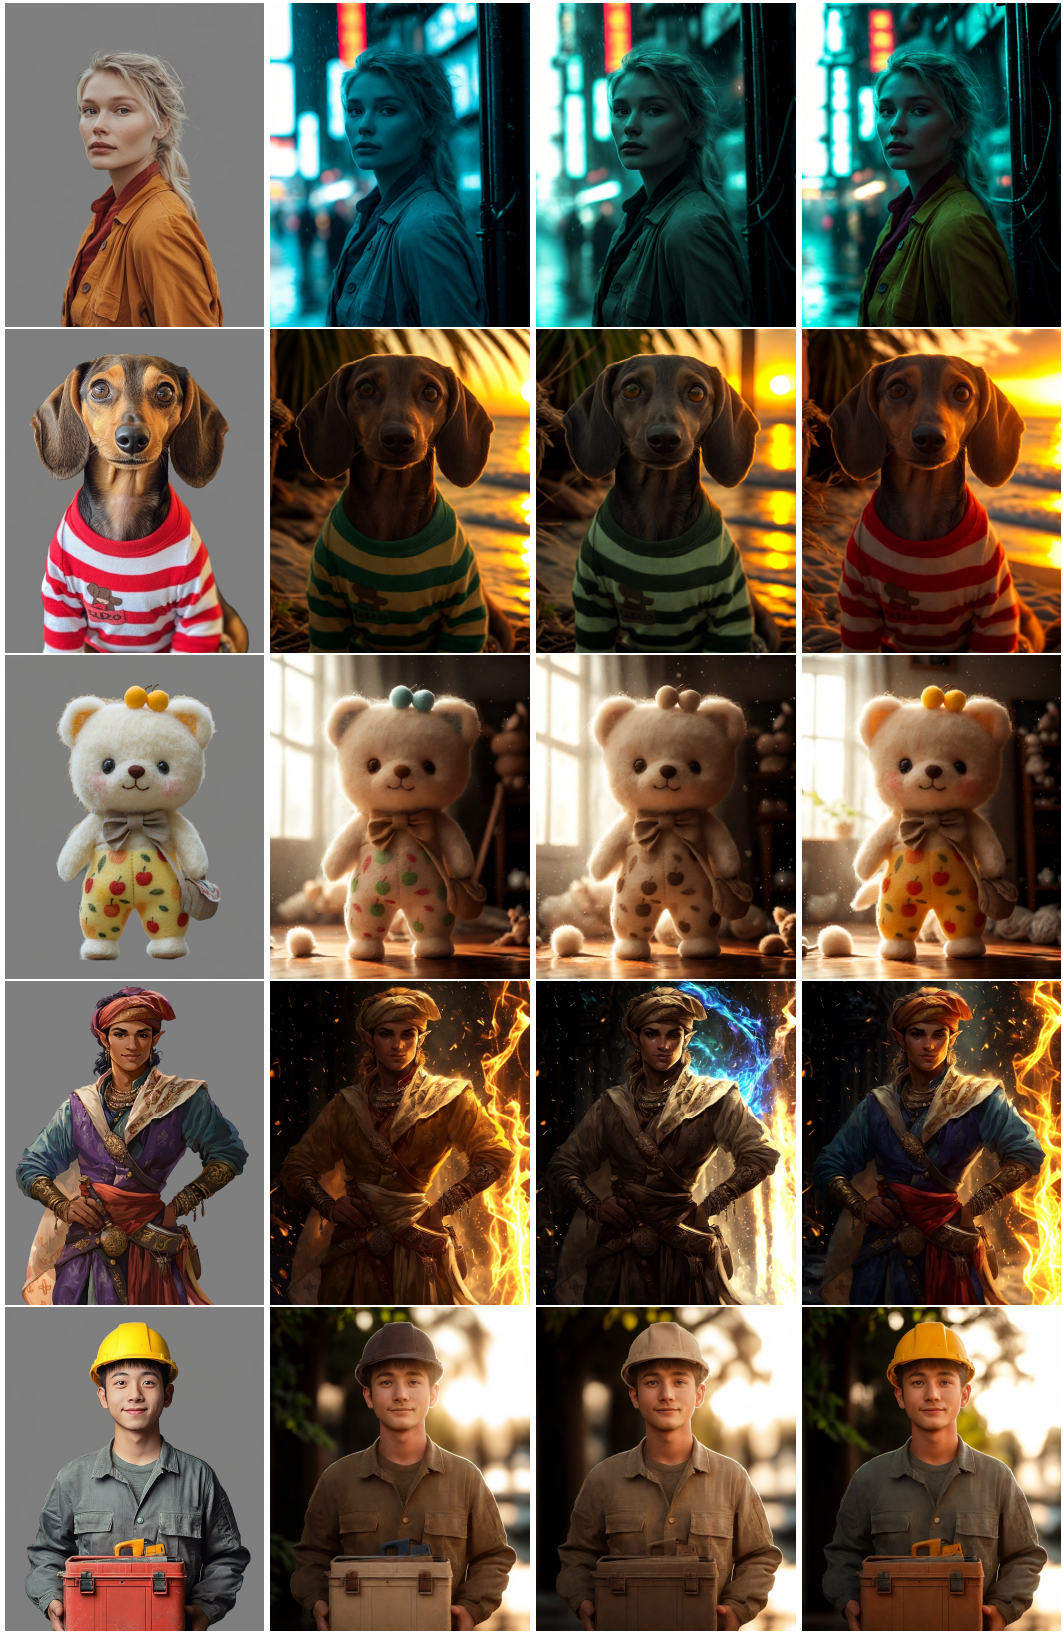

Input

removing in-the-wild data

removing light transport consistency

Ours

Figure 7: Additional Results and Ablative Study. Seed is always 12345. The prompts are “beautiful woman, blue, detailed face, sci-fi RGB glowing, cyberpunk”, “dog, home atmosphere, sunset over sea”, “toy, soft studio lighting”, “character, magic lit”, “handsome man, detailed face, natural lighting”.

324  
325  
326  
327  
328  
329  
330  
331  
332  
333  
334  
335  
336  
337  
338  
339  
340  
341  
342  
343  
344  
345  
346  
347  
348  
349  
350  
351  
352  
353  
354  
355  
356  
357  
358  
359  
360  
361  
362  
363  
364  
365  
366  
367  
368  
369  
370  
371  
372  
373  
374  
375  
376  
377

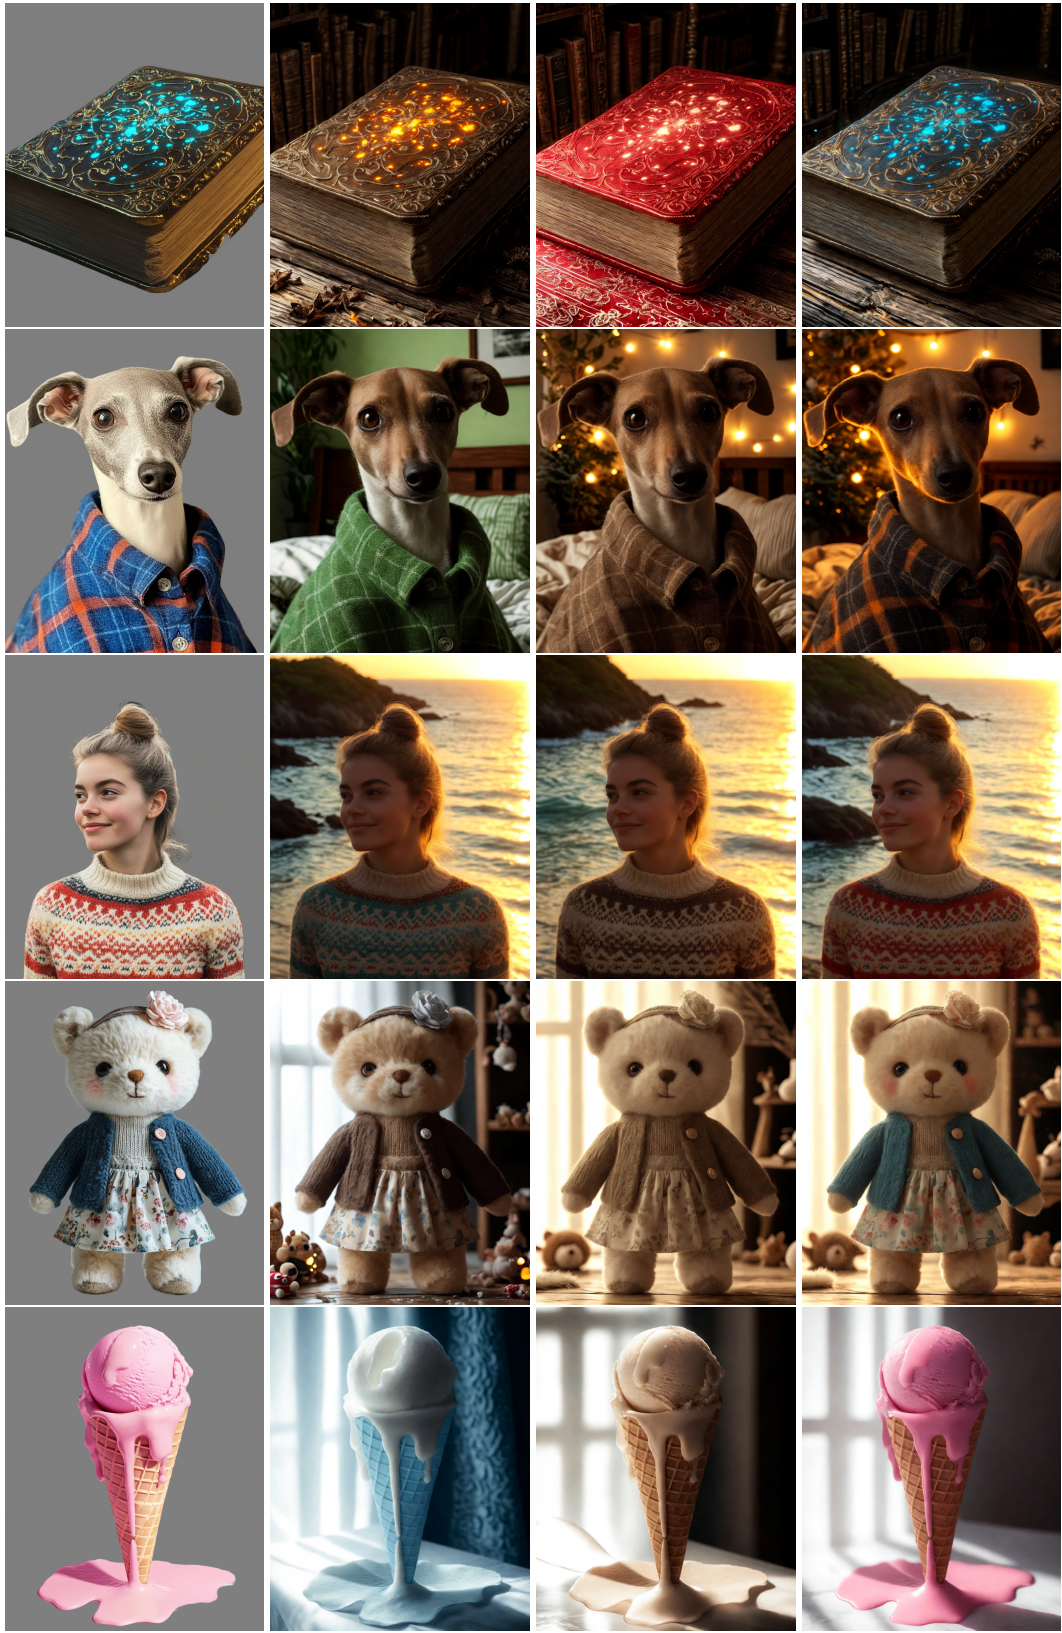

Input

removing in-the-wild  
data

removing light transport  
consistency

Ours

Figure 8: Additional Results and Ablative Study. Seed is always 12345. The prompts are “book, magic lit”, “dog, home atmosphere, cozy bedroom illumination”, “beautiful woman, detailed face, sunset over sea”, “toy, magic lit”, “ice cream, soft,studio lighting”.

378  
379  
380  
381  
382  
383  
384  
385  
386  
387  
388  
389  
390  
391  
392  
393  
394  
395  
396  
397  
398  
399  
400  
401  
402  
403  
404  
405  
406  
407  
408  
409  
410  
411  
412  
413  
414  
415  
416  
417  
418  
419  
420  
421  
422  
423  
424  
425  
426  
427  
428  
429  
430  
431

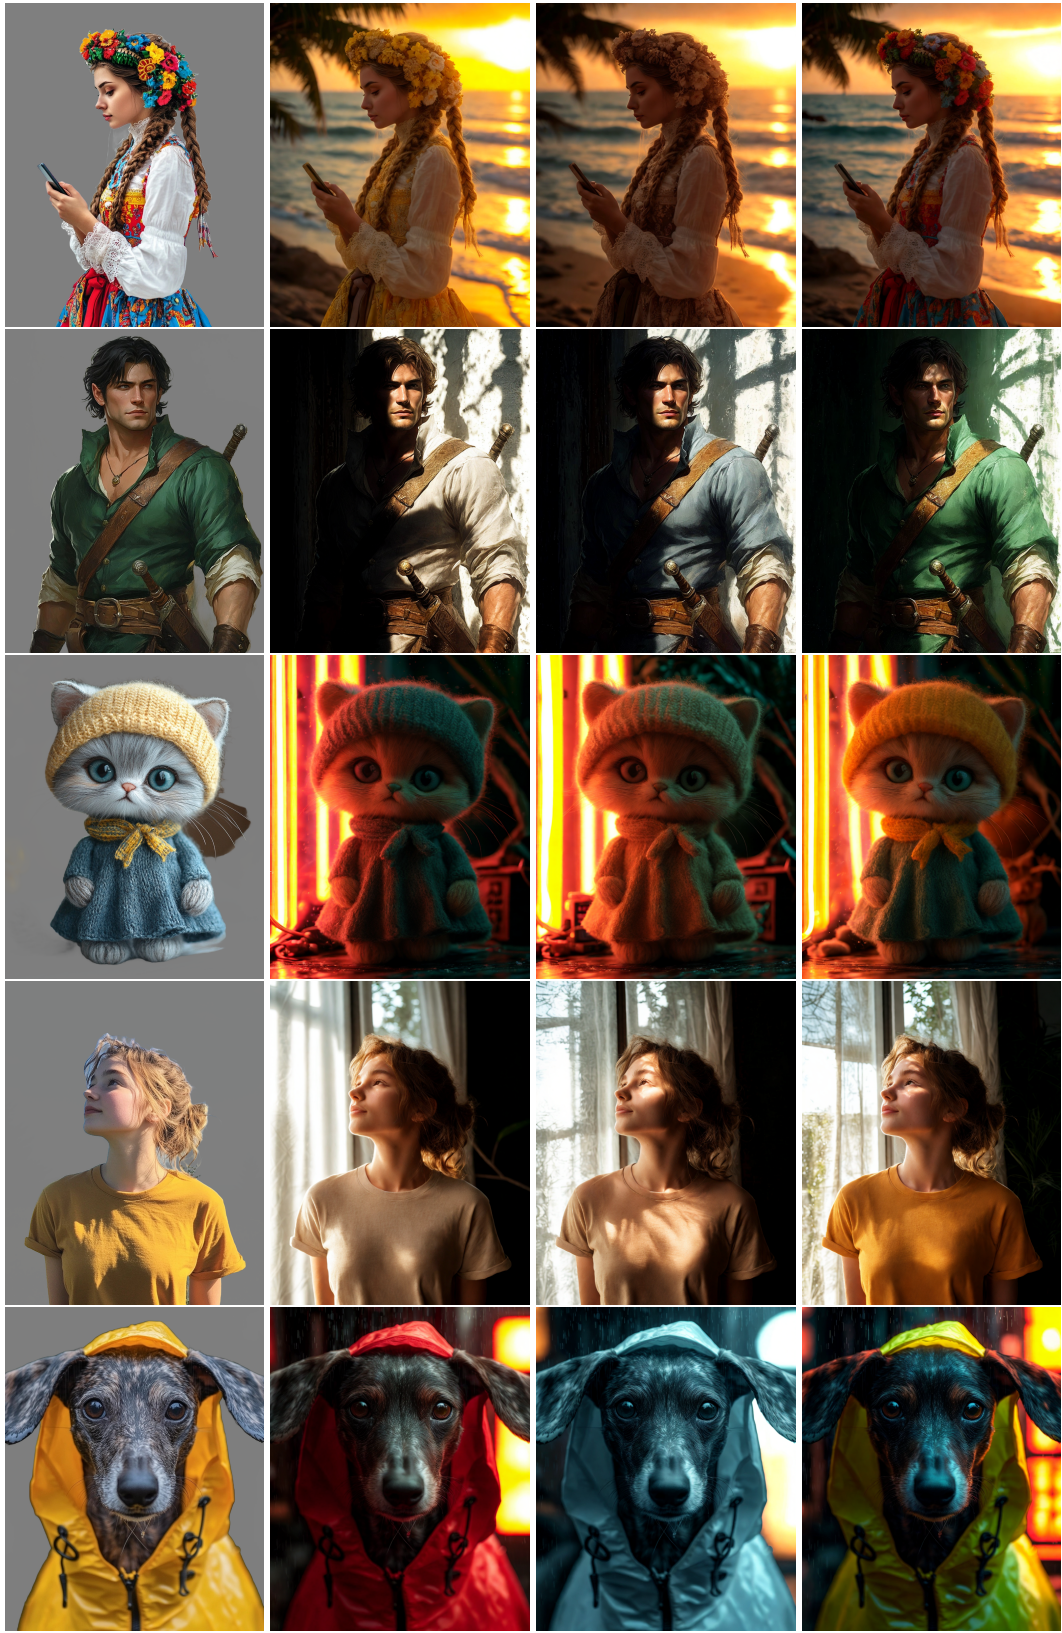

Input                      removing in-the-wild data                      removing light transport consistency                      Ours

Figure 9: Additional Results and Ablative Study. Seed is always 12345. The prompts are “beautiful woman, detailed face, sunset over sea”, “handsome man, shadow from window”, “toy, home atmosphere, neon, Wong Kar-wai, warm”, “beautiful woman, detailed face, natural lighting”, “dog, sci-fi RGB glowing, cyberpunk”.



432  
433  
434  
435  
436  
437  
438  
439  
440  
441  
442  
443  
444  
445  
446  
447  
448  
449  
450  
451  
452  
453  
454  
455  
456  
457  
458  
459  
460  
461  
462  
463  
464  
465  
466  
467  
468  
469  
470  
471  
472  
473  
474  
475  
476  
477  
478  
479  
480  
481  
482  
483  
484  
485

Background conditions:

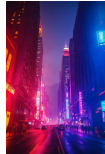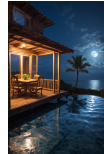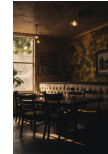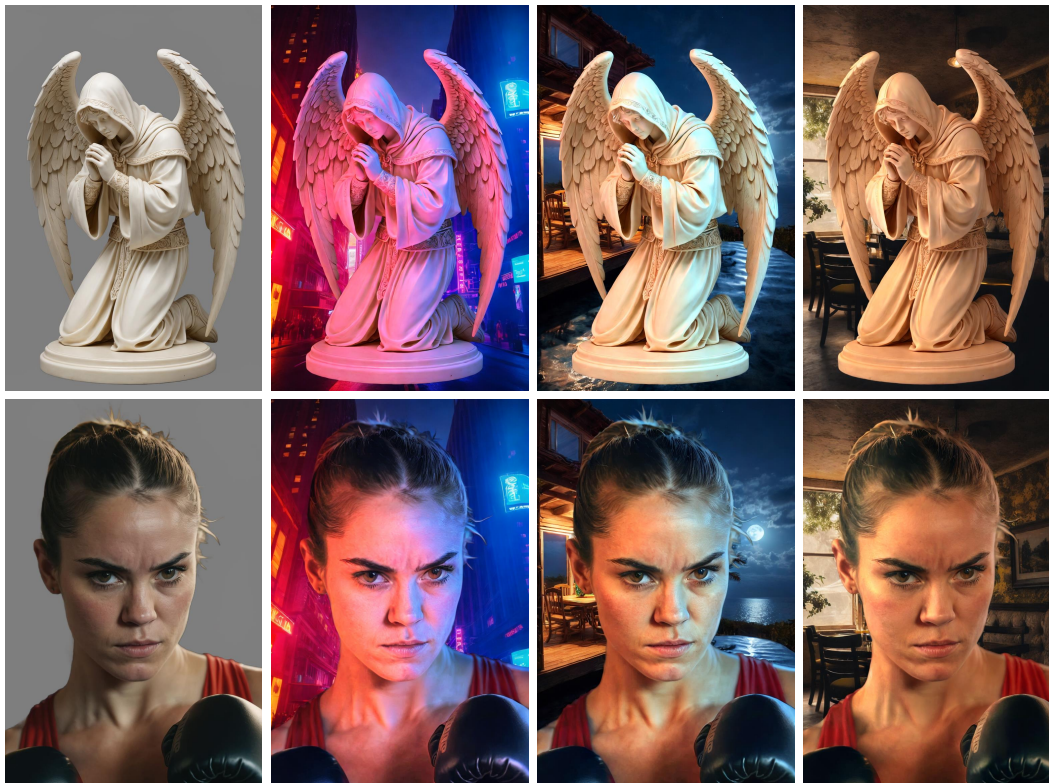

Source images

Relight 1

Relight 2

Relight 3

Figure 10: **Background-conditioned Foreground Relighting.** We demonstrate the application that relights the image foregrounds using backgrounds as conditions.

486  
487  
488  
489  
490  
491  
492  
493  
494  
495  
496  
497  
498  
499  
500  
501  
502  
503  
504  
505  
506  
507  
508  
509  
510  
511  
512  
513  
514  
515  
516  
517  
518  
519  
520  
521  
522  
523  
524  
525  
526  
527  
528  
529  
530  
531  
532  
533  
534  
535  
536  
537  
538  
539

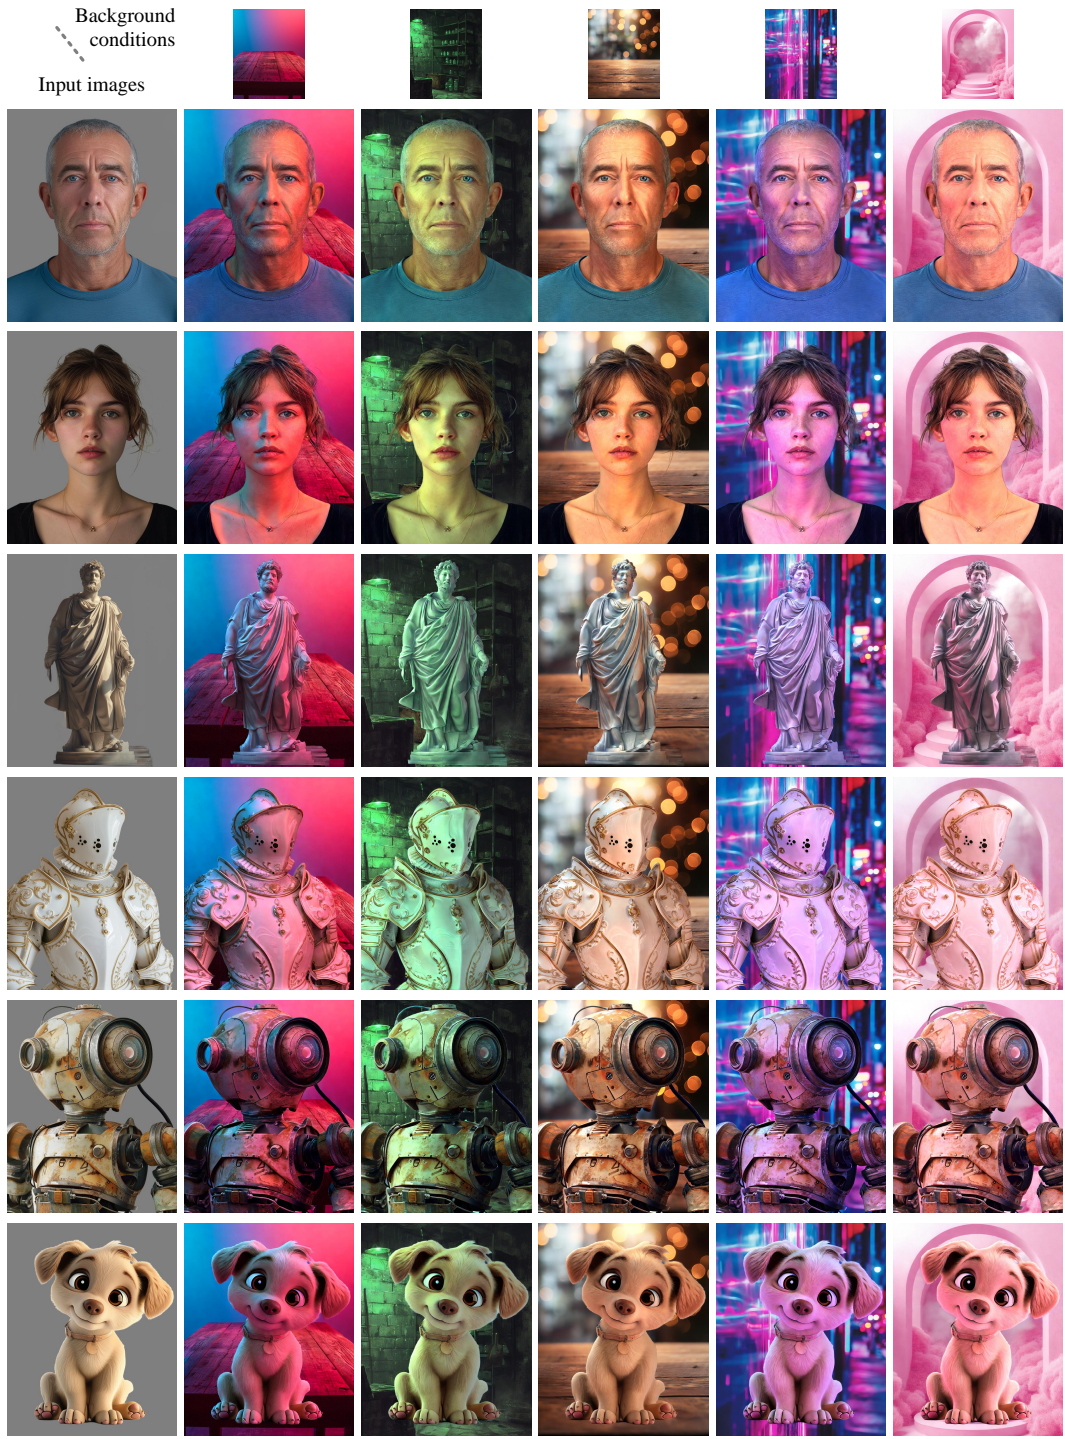

Figure 11: **Qualitative Results on Background-Conditioned Image Relighting.** Our framework relight single images using background images as conditions, without requiring light source data. The model estimate illumination in the background automatically.

540  
541  
542  
543  
544  
545  
546  
547  
548  
549  
550  
551  
552  
553  
554  
555  
556  
557  
558  
559  
560  
561  
562  
563  
564  
565  
566  
567  
568  
569  
570  
571  
572  
573  
574  
575  
576  
577  
578  
579  
580  
581  
582  
583  
584  
585  
586  
587  
588  
589  
590  
591  
592  
593

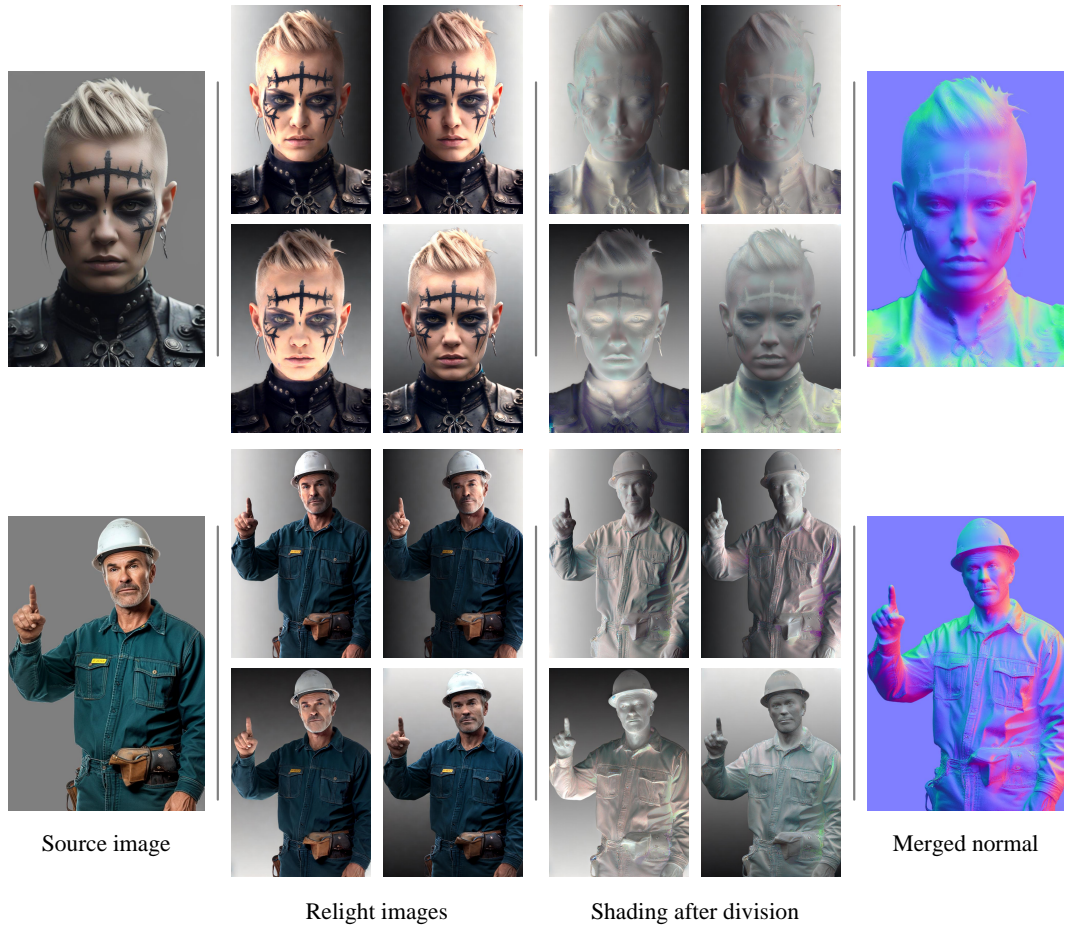

Figure 12: **Blending relighting into normal maps.** The relight results from special illumination conditions (vertical or horizontal light sources) can be blended into normal maps. Note that the model is not trained on any normal estimation data. This indicates that the model can support a range of light stage applications that requires consistent illumination.

594  
595  
596  
597  
598  
599  
600  
601  
602  
603  
604  
605  
606  
607  
608  
609  
610  
611  
612  
613  
614  
615  
616  
617  
618  
619  
620  
621  
622  
623  
624  
625  
626  
627  
628  
629  
630  
631  
632  
633  
634  
635  
636  
637  
638  
639  
640  
641  
642  
643  
644  
645  
646  
647

## REFERENCES

- Gwangbin Bae and Andrew J. Davison. Rethinking inductive biases for surface normal estimation. In *IEEE/CVF Conference on Computer Vision and Pattern Recognition (CVPR)*, 2024.
- Sai Bi, Xiaoguang Han, and Yizhou Yu. An  $l_1$  image transform for edge-preserving smoothing and scene-level intrinsic decomposition. *ACM Trans. Graph. (Proc. SIGGRAPH)*, 34(4), 2015.
- Chris Careaga, S. Mahdi H. Miangoleh, and Yağız Aksoy. Intrinsic harmonization for illumination-aware compositing. In *Proc. SIGGRAPH Asia*, 2023.
- Xiao Fu, Wei Yin, Mu Hu, Kaixuan Wang, Yuexin Ma, Ping Tan, Shaojie Shen, Dahua Lin, and Xiaoxiao Long. Geowizard: Unleashing the diffusion priors for 3d geometry estimation from a single image. *arxiv*, 2024.
- Rawal Khirodkar, Timur Bagautdinov, Julieta Martinez, Su Zhaoen, Austin James, Peter Selednik, Stuart Anderson, and Shunsuke Saito. Sapiens: Foundation for human vision models, 2024. URL <https://arxiv.org/abs/2408.12569>.
- Matthew OToole. Optical linear algebra for computational light transport, 2016.
- Patrick Pérez, Michel Gangnet, and Andrew Blake. Poisson image editing. In *ACM SIGGRAPH 2003 Papers*, SIGGRAPH '03, pp. 313–318, New York, NY, USA, 2003. Association for Computing Machinery. ISBN 1581137095. doi: 10.1145/1201775.882269. URL <https://doi.org/10.1145/1201775.882269>.
- Pakkapon Phongthawee, Worameth Chinchuthakun, Nontaphat Sinsunthithet, Amit Raj, Varun Jampani, Pramook Khungurn, and Supasorn Suwajanakorn. Diffusionlight: Light probes for free by painting a chrome ball. In *ArXiv*, 2023.
- Chen Xi, Peng Sida, Yang Dongchen, Liu Yuan, Pan Bowen, Lv Chengfei, and Zhou. Xiaowei. Intrinsicanything: Learning diffusion priors for inverse rendering under unknown illumination. *arxiv: 2404.11593*, 2024.
- Li Xu, Cewu Lu, Yi Xu, and Jiaya Jia. Image smoothing via l0 gradient minimization. *ACM Transactions on Graphics (SIGGRAPH Asia)*, 2011.
- Chongjie Ye, Lingteng Qiu, Xiaodong Gu, Qi Zuo, Yushuang Wu, Zilong Dong, Liefeng Bo, Yuliang Xiu, and Xiaoguang Han. Stablenormal: Reducing diffusion variance for stable and sharp normal. *ACM Transactions on Graphics (TOG)*, 2024.
